# Supplementary material
Source: bioRxiv or medRxiv preprint supplement (https://medrxiv.org/content/medrxiv/early/2023/05/02/2023.05.01.23288943/DC1/embed/media-1.pdf)
Supplement: Supplementary file [file media-1.pdf]

# A Predictive Autoantibody Signature in Multiple Sclerosis

Colin R. Zamecnik<sup>a\*</sup>, Gavin M. Sowa<sup>b\*</sup>, Ahmed Abdelhak<sup>a</sup>, Ravi Dandekar<sup>a</sup>, Rebecca D. Bair<sup>a</sup>, Kristen J. Wade<sup>a</sup>, Christopher M. Bartley<sup>c</sup>, Asritha Tubati<sup>a</sup>, Refujia Gomez<sup>a</sup>, Camille Fouassier<sup>a</sup>, Chloe Gerungan<sup>a</sup>, Jessica Alexander<sup>a</sup>, Anne E. Wapniarski<sup>a</sup>, Rita P. Loudermilk<sup>a</sup>, Erica L. Eggers<sup>a</sup>, Kelsey C. Zorn<sup>d</sup>, Kirtana Ananth<sup>a</sup>, Nora Jabassini<sup>a</sup>, Sabrina A. Mann<sup>d</sup>, University of California, Nicholas R. Ragan<sup>a</sup>, Adam Santaniello<sup>a</sup>, Roland G. Henry<sup>a</sup>, Sergio E. Baranzini<sup>a</sup>, Scott S. Zamvil<sup>a</sup>, Riley M. Bove<sup>a</sup>, Chu-Yueh Guo<sup>a</sup>, Jeffrey M. Gelfand<sup>a</sup>, Richard Cuneo<sup>a</sup>, H.-Christian von Büdingen<sup>a</sup>, Jorge R. Oksenberg<sup>a</sup>, Bruce AC Cree<sup>a</sup>, Jill A. Hollenbach<sup>a,e</sup>, Ari J. Green<sup>a</sup>, Stephen L. Hauser<sup>a</sup>, Mitchell T. Wallin<sup>f</sup>, Joseph L. DeRisi<sup>d,g</sup>, Michael R. Wilson<sup>a,\*\*</sup>

<sup>a</sup> UCSF Weill Institute for Neurosciences, Department of Neurology, University of California, San Francisco, CA, USA

<sup>b</sup> Department of Medicine, McGaw Medical Center of Northwestern University, Chicago, IL, USA

<sup>c</sup> UCSF Weill Institute for Neurosciences, Department of Psychiatry and Behavioral Sciences, University of California, San Francisco, CA, USA

<sup>d</sup> Department of Biochemistry and Biophysics, University of California, San Francisco, CA, USA

<sup>e</sup> Department of Epidemiology and Biostatistics, University of California, San Francisco, CA USA

<sup>f</sup> Veterans Affairs, Multiple Sclerosis Center of Excellence, Washington, DC and University of Maryland School of Medicine, Baltimore, MD, USA

<sup>g</sup> Chan Zuckerberg Biohub, San Francisco, CA, USA

\*equal contributions

\*\*Correspondence should be addressed to Prof. Michael Wilson

Email: [Michael.Wilson@ucsf.edu](mailto:Michael.Wilson@ucsf.edu)

**Table 1 - DoDSR cohort demographics.**

|                              | MS Cases    | Healthy Controls | Overall     |
|------------------------------|-------------|------------------|-------------|
|                              | (N=250)     | (N=250)          | (N=500)     |
| Gender                       |             |                  |             |
| Female                       | 84 (33.6%)  | 84 (33.6%)       | 168 (33.6%) |
| Male                         | 166 (66.4%) | 166 (66.4%)      | 332 (66.4%) |
| Race and Ethnicity           |             |                  |             |
| White                        | 159 (63.6%) | 159 (63.6%)      | 318 (63.6%) |
| Black                        | 86 (34.4%)  | 86 (34.4%)       | 172 (34.4%) |
| Hispanic Ethnicity           | 5 (2.0%)    | 5 (2.0%)         | 10 (2.0%)   |
| Birth year                   |             |                  |             |
| Mean (SD)                    | 1970 (8.0)  | 1970 (8.0)       | 1970 (8.0)  |
| Time between samples (years) |             |                  |             |
| Mean (SD)                    | 6.18 (3.3)  | 6.07 (3.4)       | 6.12 (3.3)  |
| MS Subtype                   |             |                  |             |
| Relapsing Remitting          | 192 (76.8%) | 0 (0%)           | 192 (38.4%) |
| Secondary Progressive        | 43 (17.2%)  | 0 (0%)           | 43 (8.6%)   |
| Primary Progressive          | 14 (5.6%)   | 0 (0%)           | 14 (2.8%)   |
| Progressive Relapsing        | 1 (0.4%)    | 0 (0%)           | 1 (0.2%)    |

|                                                             |           |    |           |
|-------------------------------------------------------------|-----------|----|-----------|
| Post Onset Serum Sample Collection (years*)                 |           |    |           |
| Mean (SD)                                                   | 1.2 (0.4) | NA | 1.2 (0.4) |
|                                                             |           |    |           |
| *Time in years from first symptom onset to serum collection |           |    |           |

**Table 2 - ORIGINS cohort demographics.**

|                                                 |                      |                 |
|-------------------------------------------------|----------------------|-----------------|
| ORIGINS cohort                                  |                      |                 |
|                                                 | MS (n=103)           | OND (n=23)      |
| Sex                                             |                      |                 |
| Female, n (%)                                   | 67 (65.0%)           | 14 (60.9%)      |
| Male, n (%)                                     | 36 (35.0%)           | 9 (39.1%)       |
|                                                 |                      |                 |
| Age, yrs (mean $\pm$ SD )                       | 34.1 $\pm$ 7.4       | 39.9 $\pm$ 13.4 |
|                                                 |                      |                 |
| Race                                            |                      |                 |
| White, n (%)                                    | 74 (71.8%)           | 15 (65.2%)      |
| Black, n (%)                                    | 4 (3.9%)             | 2 (8.7%)        |
| Asian, n (%)                                    | 9 (8.7%)             | 1 (4.3%)        |
|                                                 |                      |                 |
| Ethnicity                                       |                      |                 |
| Latino, n (%)                                   | 8 (17.5%)            | 3 (13.0%)       |
| Not Latino, n (%)                               | 95 (82.5%)           | 20 (87%)        |
|                                                 |                      |                 |
| EDSS (median [IQR] {Range})                     | 2 [1.5, 2.9] {0-6.5} |                 |
|                                                 |                      |                 |
| Disease duration, months (median [IQR] {Range}) | 1 [0, 1] {0-19}      |                 |

**Table 3 - MS<sub>IC</sub> demographic analysis.**

|                                                    | MS <sub>IC</sub>  | MS <sub>no-IC</sub> | P-value |
|----------------------------------------------------|-------------------|---------------------|---------|
|                                                    | (N=27)            | (N=223)             |         |
| <b>Race and Ethnicity</b>                          |                   |                     |         |
| White                                              | 21 (77.8%)        | 138 (61.9%)         | 0.164   |
| Black                                              | 5 (18.5%)         | 81 (36.3%)          |         |
| Hispanic Ethnicity                                 | 1 (3.7%)          | 4 (1.8%)            |         |
| <b>Sex</b>                                         |                   |                     |         |
| Female                                             | 9 (33.3%)         | 75 (33.6%)          | 1.0     |
| Male                                               | 18 (66.7%)        | 148 (66.4%)         |         |
| <b>Age at First Symptom Onset (years)</b>          |                   |                     |         |
| Mean (SD)                                          | 28.6 (7.0)        | 29.7 (6.8)          | 0.5     |
| Median [Min, Max]                                  | 29.0 [18.0, 42.0] | 29.0 [18.0, 49.0]   |         |
| <b>MS Subtype</b>                                  |                   |                     |         |
| Relapsing Remitting                                | 24 (88.9%)        | 168 (75.3%)         | 0.5     |
| Secondary Progressive                              | 2 (7.4%)          | 41 (18.4%)          |         |
| Primary Progressive                                | 1 (3.7%)          | 13 (5.8%)           |         |
| Progressive Relapsing                              | 0 (0%)            | 1 (0.4%)            |         |
| <b>Most Recent DSS score</b>                       |                   |                     |         |
| Mean (SD)                                          | 3.11 (1.7)        | 3.57 (2.3)          | 0.2     |
| Median [Min, Max]                                  | 3.0 [0, 7.0]      | 3.00 [0, 9.0]       |         |
| <b>Post Onset Serum Sample Collection (years*)</b> |                   |                     |         |

|                                                             |                |                 |     |
|-------------------------------------------------------------|----------------|-----------------|-----|
| Mean (SD)                                                   | 1.3 (0.5)      | 1.2 (0.4)       | 0.5 |
| Median [Min, Max]                                           | 1.0 [1.0, 2.0] | 1.00 [1.0, 2.0] |     |
|                                                             |                |                 |     |
|                                                             |                |                 |     |
| *Time in years from first symptom onset to serum collection |                |                 |     |
